# Supplementary material for: Stressed by Maternity: Changes of Cortisol Level in Lactating Domestic Cats
Source: PubMed Central journal article supplement (PMC7278448; doi:10.3390/ani10050903), 2020-05-22
Supplement: animals-10-00903-s001.pdf [file animals-10-00903-s001.pdf]

**Table S1:** Cortisol concentrations, body mass and other characteristics of females used in the study in different years.

| No | Year of study | Female name | Maternal experience | Number of litter | Kittens number per litter | Litter size | Body mass, kg | Cortisol concentration, ng/ml |                                          |                      |                      |
|----|---------------|-------------|---------------------|------------------|---------------------------|-------------|---------------|-------------------------------|------------------------------------------|----------------------|----------------------|
|    |               |             |                     |                  |                           |             |               | Sample time                   |                                          |                      |                      |
|    |               |             |                     |                  |                           |             |               | before mating                 | 0 weeks of lactation (after parturition) | 4 weeks of lactation | 8 weeks of lactation |
| 1  | 2011          | MK          | primiparous         | 1                | 3                         | small       | 2,520         | 214,00                        | 304,00                                   | 304,90               | 431,20               |
| 2  | 2012          | BN          | multiparous         | 3                | 4                         | large       | 3,330         | 24,93                         | 35,56                                    | 33,60                | 27,53                |
| 3  | 2012          | GR          | multiparous         | 2                | 4                         | large       | 3,205         | 55,39                         | 50,15                                    | 260,50               | 172,10               |
| 4  | 2012          | MR          | multiparous         | 3                | 7                         | large       | 3,560         | 141,20                        | 111,70                                   | 244,60               | 345,80               |
| 5  | 2012          | MS          | multiparous         | 2                | 5                         | large       | 3,400         | 13,16                         | 26,16                                    | 47,15                | 12,94                |
| 6  | 2012          | MK          | multiparous         | 2                | 2                         | small       | 2,730         | 481,00                        | 236,90                                   | 372,30               | 207,90               |
| 7  | 2013          | BN          | multiparous         | 4                | 6                         | large       | 3,505         | 34,86                         | 44,21                                    | 77,67                | 57,78                |
| 8  | 2013          | GM          | multiparous         | 4                | 4                         | large       | 2,580         | 564,40                        | 113,70                                   | 348,90               | 148,82               |
| 9  | 2013          | GR          | multiparous         | 3                | 3                         | small       | 3,275         | 365,00                        | 177,30                                   | 369,40               | 251,10               |
| 10 | 2013          | MR          | multiparous         | 4                | 2                         | small       | 3,600         | 217,40                        | 382,50                                   | 352,60               | 163,66               |
| 11 | 2013          | MS          | multiparous         | 3                | 1                         | small       | 3,490         | 5,98                          | 35,49                                    | 73,50                | 53,47                |
| 12 | 2013          | MK          | multiparous         | 3                | 3                         | small       | 2,850         | 798,80                        | 149,84                                   | 764,20               | 110,10               |
| 13 | 2013          | OR          | primiparous         | 1                | 5                         | large       | 3,060         | 196,50                        | 263,60                                   | 239,00               | 96,28                |
| 14 | 2013          | PZ          | multiparous         | 3                | 4                         | large       | 3,260         | 44,74                         | 112,90                                   | 132,10               | 55,66                |
| 15 | 2014          | FK          | primiparous         | 1                | 3                         | small       | 2,890         | 198,40                        | 145,20                                   | 199,70               | 163,00               |
| 16 | 2014          | GM          | multiparous         | 5                | 4                         | large       | 3,025         | 523,20                        | 458,60                                   | 660,40               | 689,00               |
| 17 | 2014          | GR          | multiparous         | 4                | 3                         | small       | 3,475         | 417,40                        | 230,50                                   | 326,60               | 249,80               |
| 18 | 2014          | OR          | multiparous         | 2                | 1                         | small       | 3,120         | 130,20                        | 236,80                                   | 328,40               | 205,40               |
| 19 | 2014          | PK          | primiparous         | 1                | 4                         | large       | 2,975         | 58,07                         | 73,44                                    | 77,44                | 118,90               |
| 20 | 2015          | GM          | multiparous         | 6                | 3                         | small       | 3,040         |                               | 80,89                                    | 754,38               | 341,73               |
| 21 | 2015          | GR          | multiparous         | 5                | 5                         | large       | 3,450         |                               | 51,96                                    | 95,05                | 66,16                |
| 22 | 2015          | MK          | multiparous         | 4                | 5                         | large       | 2,910         |                               | 200,15                                   | 317,76               | 995,18               |
| 23 | 2015          | OR          | multiparous         | 3                | 4                         | large       | 3,200         |                               | 157,74                                   | 213,77               | 195,24               |

|    |      |    |             |   |   |       |                          |                             |                             |                             |                             |
|----|------|----|-------------|---|---|-------|--------------------------|-----------------------------|-----------------------------|-----------------------------|-----------------------------|
| 24 | 2018 | FK | multiparous | 3 | 5 | large | 3,225                    |                             | 98,03                       | 54,87                       | 174,15                      |
| 25 | 2018 | PZ | multiparous | 6 | 5 | large | 3,350                    | 109,60                      | 76,71                       | 39,95                       | 25,00                       |
| 26 | 2018 | PK | multiparous | 3 | 4 | large | 3,460                    |                             | 32,81                       | 62,89                       | 28,56                       |
| 27 | 2018 | VR | primiparous | 1 | 2 | small | 2,815                    | 282,00                      | 119,72                      | 729,00                      | 497,25                      |
|    |      |    |             |   |   |       | 3,16 ± 0,06 <sup>1</sup> | 232,20 ± 47,48 <sup>1</sup> | 148,39 ± 21,37 <sup>1</sup> | 277,06 ± 43,10 <sup>1</sup> | 217,92 ± 42,84 <sup>1</sup> |

<sup>1</sup> Data are presented as mean ± SE.

**Table S2.** Pairwise comparisons of cortisol concentrations at different sampling points (before mating, after parturition, 4 weeks of lactation and 8 weeks of lactation) in the domestic cat females.

| Contrast                                    | Estimate | SE    | t-ratio | p-value       |
|---------------------------------------------|----------|-------|---------|---------------|
| before mating – after parturition           | 0.056    | 0.073 | 0.761   | 0.4486        |
| before mating – 4 weeks of lactation        | - 0.176  | 0.073 | - 2.427 | <b>0.0173</b> |
| before mating – 8 weeks of lactation        | - 0.029  | 0.073 | - 0.395 | 0.6938        |
| after parturition – 4 weeks of lactation    | - 0.232  | 0.067 | - 3.483 | <b>0.0008</b> |
| after parturition – 8 weeks of lactation    | - 0.084  | 0.067 | - 1.263 | 0.2101        |
| 4 weeks of lactation – 8 weeks of lactation | 0.148    | 0.067 | 2.22    | <b>0.0292</b> |

Results of post-hoc comparisons are presented. Cortisol concentrations are log-transformed. Results are averaged over the levels of litter size.

**Table 3.** Pairwise comparisons of cortisol concentrations between the domestic cat females with small and large litters at different sampling points (before mating, after parturition, 4 weeks of lactation and 8 weeks of lactation).

| Sample point         | Contrast      | Estimate | SE    | t-ratio | p-value |
|----------------------|---------------|----------|-------|---------|---------|
| before mating        | large – small | - 0.124  | 0.123 | - 1.008 | 0.316   |
| after parturition    | large – small | - 0.023  | 0.109 | - 0.214 | 0.831   |
| 4 weeks of lactation | large – small | - 0.198  | 0.109 | - 1.822 | 0.0719  |
| 8 weeks of lactation | large – small | - 0.064  | 0.109 | - 0.587 | 0.5588  |

Results of post-hoc comparisons are shown. Cortisol concentrations are log-transformed.

**Table S4.** Pairwise comparisons of cortisol concentrations at different sampling points (before mating, after parturition, 4 weeks of lactation and 8 weeks of lactation) in the domestic cat females with small and large litters.

| Contrasts                                   | Females with large litters |       |         |         | Females with small litters |       |         |         |
|---------------------------------------------|----------------------------|-------|---------|---------|----------------------------|-------|---------|---------|
|                                             | $\beta$                    | SE    | t-ratio | p-value | $\beta$                    | SE    | t-ratio | p-value |
| before mating –after parturition            | 0.012                      | 0.099 | 0.125   | 0.9006  | 0.113                      | 0.108 | 1.048   | 0.2977  |
| before mating – 4 weeks of lactation        | -0.148                     | 0.099 | -1.492  | 0.1394  | -0.222                     | 0.108 | -2.054  | 0.0432  |
| before mating – 8 weeks of lactation        | -0.055                     | 0.099 | -0.555  | 0.5802  | 0.005                      | 0.108 | 0.049   | 0.9613  |
| after parturition – 4 weeks of lactation    | -0.161                     | 0.087 | -1.843  | 0.069   | -0.336                     | 0.105 | -3.195  | 0.002   |
| after parturition – 8 weeks of lactation    | -0.068                     | 0.087 | -0.776  | 0.4403  | -0.108                     | 0.105 | -1.03   | 0.3063  |
| 4 weeks of lactation – 8 weeks of lactation | 0.09                       | 0.087 | 1.068   | 0.2888  | 0.227                      | 0.105 | 2.166   | 0.0333  |

Results of post-hoc comparisons are shown. Cortisol concentrations are log-transformed.  $\beta$  refers to the model estimate.

**Table S5.** Pairwise comparisons of cortisol concentrations between the domestic cat females with different number of kittens per litter.

| <b>Contrast</b> | <b>Estimate</b> | <b>SE</b> | <b>t-ratio</b> | <b>p-value</b> |
|-----------------|-----------------|-----------|----------------|----------------|
| 1 – 2           | -0.406          | 0.22      | -1.843         | 0.0701         |
| 1 – 3           | -0.253          | 0.144     | -1.756         | 0.0824         |
| 1 – 4           | -0.192          | 0.157     | -1.223         | 0.2248         |
| 1 – 5           | -0.064          | 0.131     | -0.492         | 0.6238         |
| 1 – 6           | -0.152          | 0.225     | -0.673         | 0.5027         |
| 1 – 7           | -0.499          | 0.334     | -1.497         | 0.1407         |
| 2 – 3           | 0.153           | 0.17      | 0.9            | 0.3721         |
| 2 – 4           | 0.214           | 0.163     | 1.315          | 0.1931         |
| 2 – 5           | 0.342           | 0.169     | 2.021          | 0.0473         |
| 2 – 6           | 0.254           | 0.276     | 0.922          | 0.3601         |
| 2 – 7           | -0.093          | 0.202     | -0.46          | 0.6468         |
| 3 – 4           | 0.061           | 0.105     | 0.576          | 0.5663         |
| 3 – 5           | 0.188           | 0.099     | 1.899          | 0.0609         |
| 3 – 6           | 0.101           | 0.204     | 0.494          | 0.6222         |
| 3 – 7           | -0.246          | 0.295     | -0.834         | 0.4083         |
| 4 – 5           | 0.128           | 0.099     | 1.287          | 0.2015         |
| 4 – 6           | 0.041           | 0.202     | 0.2            | 0.8418         |
| 4 – 7           | -0.307          | 0.273     | -1.124         | 0.2655         |
| 5 – 6           | -0.087          | 0.215     | -0.406         | 0.6859         |
| 5 – 7           | -0.435          | 0.285     | -1.528         | 0.1321         |
| 6 – 7           | -0.347          | 0.385     | -0.902         | 0.3709         |

Results of post-hoc comparisons are presented. Cortisol concentrations are log-transformed. Results are averaged over the levels of sampling point.

**Table S6.** Pairwise comparisons of cortisol concentrations between the domestic cat females with different number of kittens per litter at 4 weeks of lactation.

| <b>Contrast</b> | <b>Estimate</b> | <b>SE</b> | <b>t-ratio</b> | <b>p-value</b> |
|-----------------|-----------------|-----------|----------------|----------------|
| 1 – 2           | -0.201          | 0.254     | -0.793         | 0.4402         |
| 1 – 3           | -0.227          | 0.193     | -1.173         | 0.2691         |
| 1 – 4           | 0.008           | 0.193     | 0.042          | 0.9675         |
| 1 – 5           | 0.224           | 0.182     | 1.232          | 0.2448         |
| 1 – 6           | -0.222          | 0.334     | -0.665         | 0.5187         |
| 1 – 7           | -0.07           | 0.37      | -0.188         | 0.8535         |
| 2 – 3           | -0.025          | 0.192     | -0.131         | 0.8973         |
| 2 – 4           | 0.21            | 0.209     | 1.001          | 0.3325         |
| 2 – 5           | 0.426           | 0.209     | 2.034          | 0.0584         |
| 2 – 6           | -0.021          | 0.345     | -0.06          | 0.9526         |
| 2 – 7           | 0.132           | 0.273     | 0.483          | 0.6378         |
| 3 – 4           | 0.234           | 0.13      | 1.806          | 0.0981         |
| 3 – 5           | 0.451           | 0.133     | 3.398          | 0.0061         |
| 3 – 6           | 0.004           | 0.296     | 0.015          | 0.9886         |
| 3 – 7           | 0.157           | 0.336     | 0.468          | 0.6472         |
| 4 – 5           | 0.216           | 0.129     | 1.671          | 0.1227         |
| 4 – 6           | -0.23           | 0.276     | -0.834         | 0.4205         |
| 4 – 7           | -0.078          | 0.338     | -0.23          | 0.8213         |
| 5 – 6           | -0.447          | 0.31      | -1.439         | 0.1739         |
| 5 – 7           | -0.294          | 0.333     | -0.881         | 0.392          |
| 6 – 7           | 0.153           | 0.471     | 0.325          | 0.7511         |

Results of post-hoc comparisons are presented. Cortisol concentrations are log-transformed.

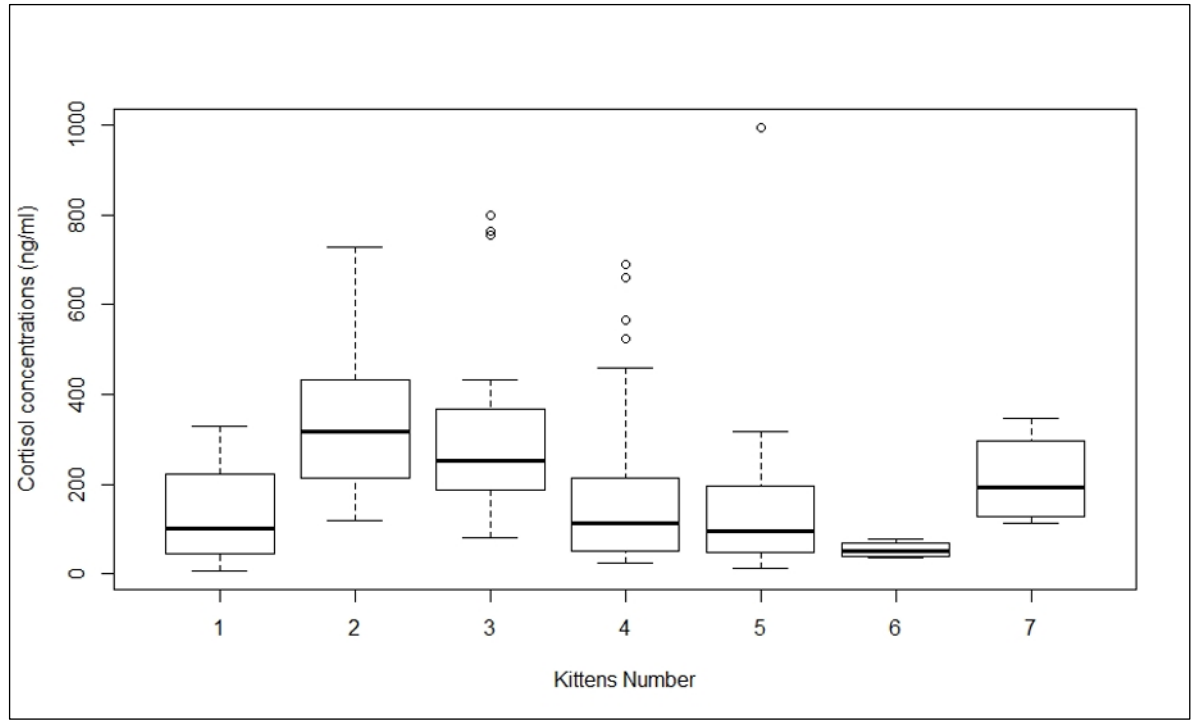

**Figure S3.** Cortisol concentrations in females of the domestic cat with different number of kittens per litter. Plotted are the median (horizontal line in the box), lower and upper quartiles (horizontal box boundaries), minimum and maximum values (whiskers).
